# Supplementary material for: Mannitol Is a Good Anticaking Agent for Spray-Dried Hydroxypropyl-Beta-Cyclodextrin Microcapsules
Source: MDPI journal article supplement (doi:10.3390/molecules28031119), 2023-01-22
Supplement: s1 [file s1]

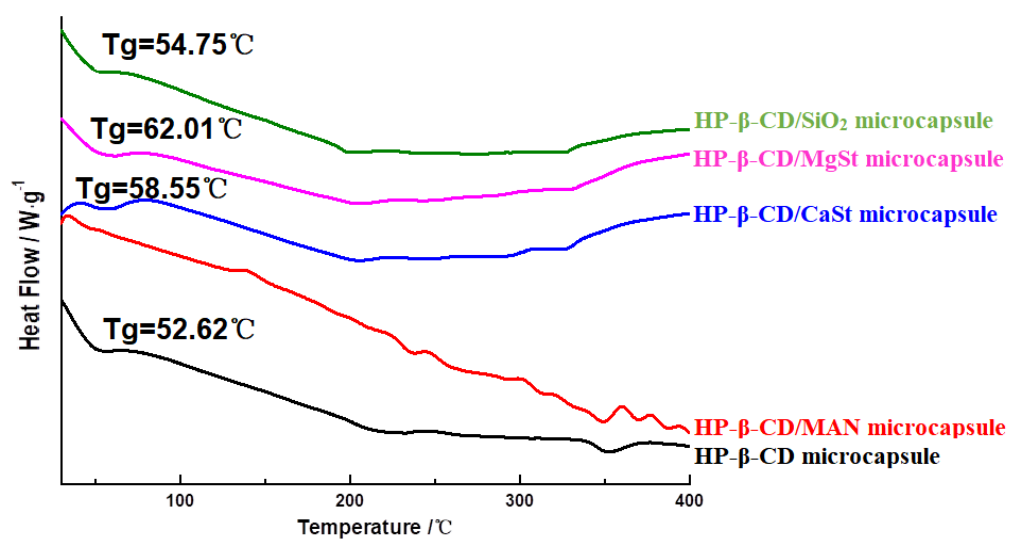

Figure S1: Differential scanning calorimeter patterns of microcapsules with anticaking agents
